# Supplementary material for: Microplastic-Free Microcapsules to Encapsulate Health-Promoting Limonene Oil
Source: MDPI journal article supplement (doi:10.3390/molecules27217215), 2022-10-25
Supplement: s1 [file s1]

## Supplementary Material

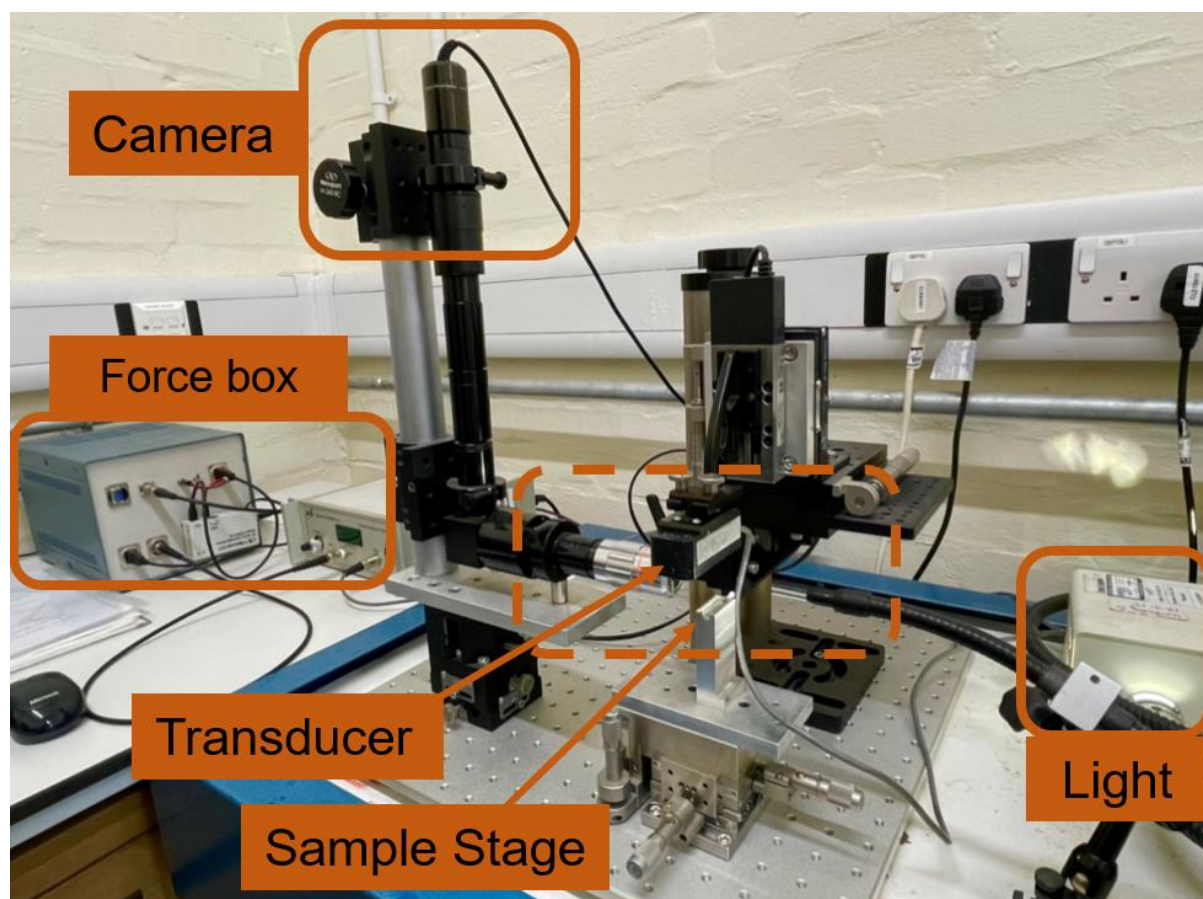

**Figure S1.** Semiautomatic micromanipulation rig (University of Birmingham, England, UK).

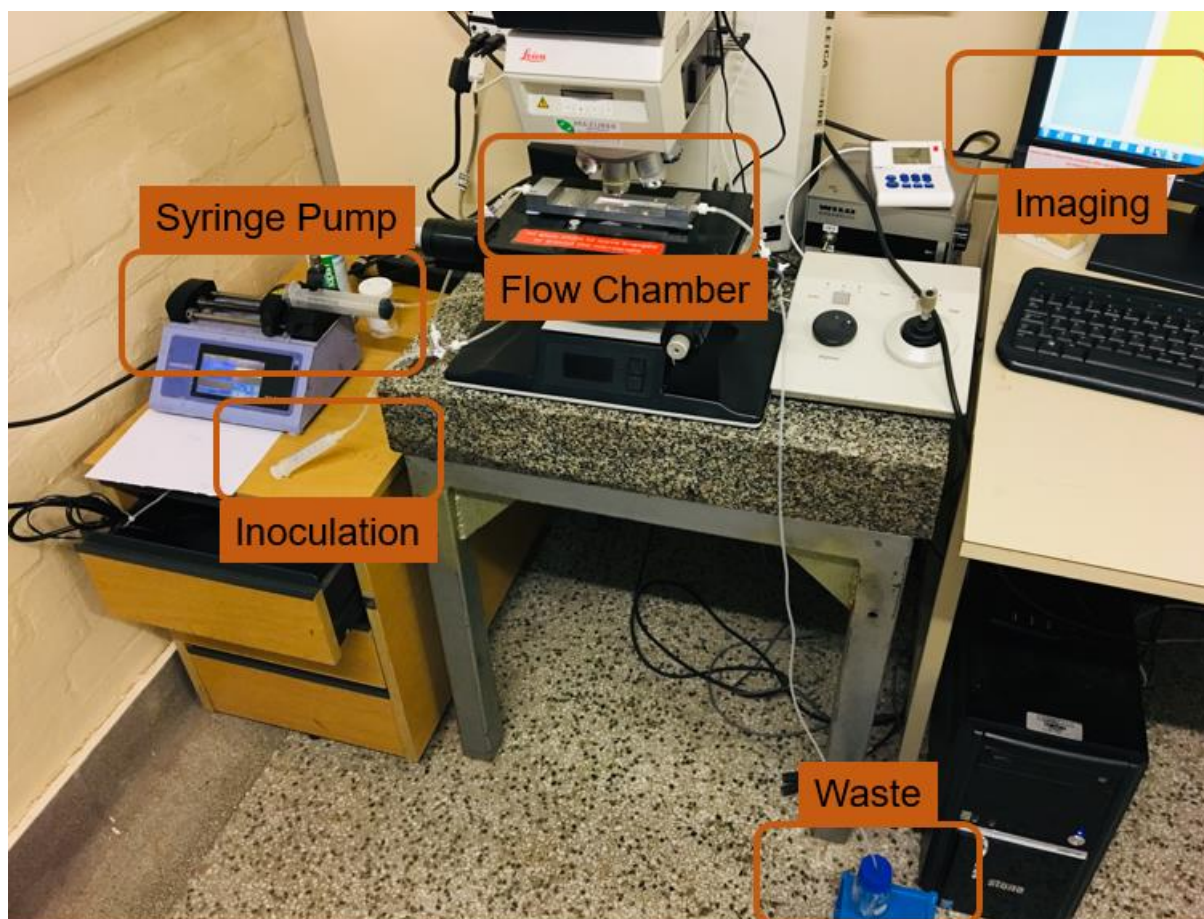

**Figure S2.** Microfluidic flow chamber apparatus (University of Birmingham, England, UK).
